# Supplementary material for: Evaluation of Dietary Intakes and Supplement Use in Paralympic Athletes
Source: MDPI journal article supplement (doi:10.3390/nu9111266), 2017-11-21
Supplement: s1 [file s1]

## Variable Values

| Value            |   | Label            |
|------------------|---|------------------|
| Gender           | 0 | Male             |
|                  | 1 | Female           |
| SportClass       | 0 | endurance        |
|                  | 1 | appearance       |
|                  | 2 | intermittent     |
|                  | 3 | strength         |
| TrainingPhase    | 0 | competition      |
|                  | 1 | offseasontrain   |
|                  | 2 | offseasonnotrain |
| LevelComp        | 0 | Provincial       |
|                  | 1 | National         |
|                  | 2 | International    |
| TrainingHrs      | 0 | 0-5              |
|                  | 1 | 6-10             |
|                  | 2 | 11-15            |
|                  | 3 | 15+              |
| UseSuppl         | 0 | No               |
|                  | 1 | Yes              |
| ReasonMedical    | 0 | no               |
|                  | 1 | yes              |
| ReasonDiet       | 0 | no               |
|                  | 1 | yes              |
| ReasonHealthy    | 0 | no               |
|                  | 1 | yes              |
| ReasonMuscle     | 0 | no               |
|                  | 1 | yes              |
| ReasonEndurance  | 0 | no               |
|                  | 1 | yes              |
| ReasonOthers     | 0 | no               |
|                  | 1 | yes              |
| ReasonConvenient | 0 | no               |
|                  | 1 | yes              |
| ReasonAllergy    | 0 | no               |
|                  | 1 | yes              |

## Variable Values

| Value              |   | Label |
|--------------------|---|-------|
| ReasonEnergy       | 0 | no    |
|                    | 1 | yes   |
| ReasonRecovery     | 0 | no    |
|                    | 1 | yes   |
| ReasonImmune       | 0 | no    |
|                    | 1 | yes   |
| ReasonPerformance  | 0 | no    |
|                    | 1 | yes   |
| ReasonTold         | 0 | no    |
|                    | 1 | yes   |
| ReasonTaste        | 0 | no    |
|                    | 1 | yes   |
| ReasonWeight       | 0 | no    |
|                    | 1 | yes   |
| ReasonDietRestrict | 0 | no    |
|                    | 1 | yes   |
| InfoInternet       | 0 | no    |
|                    | 1 | yes   |
| InfoPharam         | 0 | no    |
|                    | 1 | yes   |
| InfoNaturo         | 0 | no    |
|                    | 1 | yes   |
| InfoMD             | 0 | no    |
|                    | 1 | yes   |
| InfoAT             | 0 | no    |
|                    | 1 | yes   |
| InfoFamily         | 0 | no    |
|                    | 1 | yes   |
| InfoTV             | 0 | no    |
|                    | 1 | yes   |
| InfoPhysio         | 0 | no    |
|                    | 1 | yes   |
| InfoHealthStore    | 0 | no    |
|                    | 1 | yes   |

## Variable Values

| Value         |   | Label       |
|---------------|---|-------------|
| InfoPrint     | 0 | no          |
|               | 1 | yes         |
| InfoCoach     | 0 | no          |
|               | 1 | yes         |
| InfoDietitan  | 0 | no          |
|               | 1 | yes         |
| InfoLabel     | 0 | no          |
|               | 1 | yes         |
| InfoWorkshop  | 0 | no          |
|               | 1 | yes         |
| InfoTeammates | 0 | no          |
|               | 1 | yes         |
| InfoNA        | 0 | no          |
|               | 1 | yes         |
| Presentations | 0 | no          |
|               | 1 | yes         |
| Print         | 0 | no          |
|               | 1 | yes         |
| Consult       | 0 | no          |
|               | 1 | yes         |
| Internet      | 0 | no          |
|               | 1 | yes         |
| Family        | 0 | no          |
|               | 1 | yes         |
| Coach         | 0 | no          |
|               | 1 | yes         |
| HealthStore   | 0 | no          |
|               | 1 | yes         |
| Doctor        | 0 | no          |
|               | 1 | yes         |
| DietRating    | 0 | NotHealthy  |
|               | 1 | Average     |
|               | 2 | VeryHealthy |

## Variable Values

| Value          |   | Label        |
|----------------|---|--------------|
| MVMMCoded      | 0 | Daily        |
|                | 5 | Occasionally |
|                | 6 | Never        |
| BVitCoded      | 0 | Daily        |
|                | 5 | Occasionally |
|                | 6 | Never        |
| VitCCoded      | 0 | Daily        |
|                | 5 | Occasionally |
|                | 6 | Never        |
| VitECoded      | 0 | Daily        |
|                | 5 | Occasionally |
|                | 6 | Never        |
| VitDCoded      | 0 | Daily        |
|                | 5 | Occasionally |
|                | 6 | Never        |
| IronCoded      | 0 | Daily        |
|                | 5 | Occasionally |
|                | 6 | Never        |
| CalciumCoded   | 0 | Daily        |
|                | 5 | Occasionally |
|                | 6 | Never        |
| MagnesiumCoded | 0 | Daily        |
|                | 5 | Occasionally |
|                | 6 | Never        |
| VitWaterCoded  | 0 | Daily        |
|                | 5 | Occasionally |
|                | 6 | Never        |
| ProteinCoded   | 0 | Daily        |
|                | 5 | Occasionally |
|                | 6 | Never        |
| SportBarCoded  | 0 | Daily        |
|                | 5 | Occasionally |
|                | 6 | Never        |

## Variable Values

| Value              |   | Label        |
|--------------------|---|--------------|
| BCAACoded          | 0 | Daily        |
|                    | 5 | Occasionally |
|                    | 6 | Never        |
| GlucosamineCoded   | 0 | Daily        |
|                    | 5 | Occasionally |
|                    | 6 | Never        |
| BetACoded          | 0 | Daily        |
|                    | 5 | Occasionally |
|                    | 6 | Never        |
| GlutamineCoded     | 0 | Daily        |
|                    | 5 | Occasionally |
|                    | 6 | Never        |
| FattyAcidCoded     | 0 | Daily        |
|                    | 5 | Occasionally |
|                    | 6 | Never        |
| SportDrinkCoded    | 0 | Daily        |
|                    | 5 | Occasionally |
|                    | 6 | Never        |
| EnergyDrinkCoded   | 0 | Daily        |
|                    | 5 | Ocasionally  |
|                    | 6 | Never        |
| CaffeineCoded      | 0 | Daily        |
|                    | 5 | Occasionally |
|                    | 6 | Never        |
| CreatineCoded      | 0 | Daily        |
|                    | 5 | Occasionally |
|                    | 6 | Never        |
| RecoveryDrinkCoded | 0 | Daily        |
|                    | 5 | Occasionally |
|                    | 6 | Never        |
| PlantExtractCoded  | 0 | Daily        |
|                    | 5 | Occasionally |
|                    | 6 | Never        |

### Variable Values

| Value           |   | Label        |
|-----------------|---|--------------|
| ProbioticCoded  | 0 | Daily        |
|                 | 5 | Occasionally |
|                 | 6 | Never        |
| GelGummiesCoded | 0 | Daily        |
|                 | 5 | Occasionally |
|                 | 6 | Never        |
