# Supplementary material for: Evaluation of Dietary Intakes and Supplement Use in Paralympic Athletes
Source: Nutrients. 2017 Nov 21;9(11):1266. doi: 10.3390/nu9111266 (PMC5707738; doi:10.3390/nu9111266)
Supplement: Supplementary file 1 [file nutrients-09-01266-s001.zip]

Archive with 6 entries (6 files):
- S5 Dietary Supplement Usage Codes.pdf
- S6 Table 4. Dietary supplements and ergogenic aids.docx
- S1 Dietary Supplement Questionnaire.pdf
- S2 Three Day Food Records.pdf
- S3 Nutrient Intakes.xlsx
- S4 Dietary Supplement Usage.xlsx
