# Supplementary material for: Evaluation of Dietary Intakes and Supplement Use in Paralympic Athletes
Source: Nutrients. 2017 Nov 21;9(11):1266. doi: 10.3390/nu9111266 (PMC5707738; doi:10.3390/nu9111266)
Supplement: Supplementary file 1 [file nutrients-09-01266-s001.zip › S3 Nutrient Intakes.xlsx]

## Sheet: Nutrient Intakes
UserID	Gender	Age	Weight	Height	BMI	Kcal	Protein	ProteinPct	ProteinBW	CHO	CHOPct	CHOBW	Fiber	Sugar	SugarPct	TotalFat	FatPct	FatBW	SatFat	SatFatPct	Monofat	Polyfat	Cholesterol	TransFat	Omega3	Omega6	Calcium	CalciumPct	Iron	IronPct	Magnesium	MagnesiumPct	Potassium	PotassiumPct	Selenium	SeleniumPct	Sodium	SodiumPct	SodiumUL	Zinc	ZincPct	VitaminA	VitAPct	VitC	VitCPct	VitD	VitDPct	VitE	VitEPct
13	Female	18	47.62	1.45	22.72	1600	91.7	22.93	1.93	173.4	43.35	3.64	14	84	21	62.1	34.93	1.3	22.2	12.49	24.2	10.6	534.7	0.39	0.94	1.35	1116	85.85	13.2	88	287.1	79.75	2858	60.81	159.2	289.45	2042	88.78	88.78	12.5	138.89	869.7	124.24	63.6	97.85	4.99	33.29	8.31	55.39
6	Female	22	47.62	1.6	18.6	1439	49.4	13.73	1.04	186	51.7	3.91	19	87	24.04	54.8	34.27	1.15	19	11.88	19.8	9.58	121.3	1.92	1.04	0.96	768.5	76.85	8.95	49.73	187.2	60.39	1991	42.36	60.2	109.45	1893	82.3	82.3	6.53	81.6	863.2	123.31	32.1	42.8	1.02	6.8	6.46	43.07
17	Female	23	54.43	1.52	23.44	1494	59.4	15.9	1.09	169.4	45.35	3.11	9	66	17.64	62.9	37.89	1.16	24	14.46	20.9	10.3	332.7	0.37	1.11	2.99	357.6	35.76	11.1	61.67	171.8	55.42	1388	29.53	77.7	141.27	2256	98.09	98.09	7.63	95.35	415.8	59.4	12.7	16.93	1.69	11.28	7.71	51.42
19	Female	24	84	1.8	25.83	1603	135.6	33.84	1.61	156.3	39	1.86	22	55	13.72	41.1	23.08	0.49	13.1	7.35	11.5	10.4	411.1	0.15	1.06	2.25	756.5	75.65	25	138.89	297.2	95.87	3084	65.62	113.6	206.55	1574	68.43	68.43	9.5	118.79	853.8	121.97	75.8	101.07	0.77	5.15	4.99	33.24
5	Female	25	54.43	1.57	21.95	2059	97.4	18.92	1.79	243.4	47.29	4.47	21	103	20.05	80.7	35.27	1.48	24	10.49	27.3	19.5	479.9	0.87	1.87	2.41	953.9	95.39	23.6	131.11	384.3	123.97	2866	60.98	120.6	219.27	3694	160.61	160.61	14.3	178.75	1308	186.86	37.1	49.47	5.37	35.77	18.8	125.33
14	Female	26	72.57	1.57	29.26	1209	44.4	14.69	0.61	175.3	58	2.42	22	65	21.41	39.4	29.33	0.54	14.5	10.79	14.1	7.32	176.9	0.12	0.71	0.72	629.5	62.95	11.2	62.22	257	82.9	1863	39.64	80.3	146	1171	50.91	50.91	9	112.44	898.2	128.31	124.1	165.47	1.84	12.29	9.7	64.67
15	Female	26	51.25	1.68	18.24	2061	80.7	15.66	1.57	265.7	51.57	5.18	27	87	16.83	80.3	35.07	1.57	26.3	11.48	29.5	16.7	215.4	0.55	0.77	0.27	709.3	70.93	16.2	90	406.1	131	2656	56.51	113	205.45	2676	116.35	116.35	14.2	177.5	715.1	102.16	24.8	33.07	4.53	30.21	15.6	104
11	Female	27	71.66	1.63	27.12	2360	105.6	17.9	1.47	286.8	48.61	4	22	142	23.98	91.7	34.97	1.28	31.1	11.86	32	19.9	383.6	0.93	3.07	8.48	1267	126.7	17.9	99.44	355.3	114.61	3114	66.26	161.6	293.82	3328	144.7	144.7	16.4	205	914.1	130.59	156.8	209.07	4.31	28.72	7.68	51.17
18	Female	27	45.81	1.42	22.64	1176	44.8	15.24	0.98	169.7	57.72	3.7	15	78	26.46	37.5	28.7	0.82	6.43	4.92	17	11.3	143.5	0.01	1.35	0.3	547.8	54.78	10	55.56	169.9	54.81	1650	35.11	67.4	122.55	1310	56.96	56.96	5.15	64.38	908.1	129.73	116.8	155.73	2.54	16.91	7.67	51.14
12	Female	28	68.03	1.55	28.34	1578	72.6	18.4	1.07	219.7	55.69	3.23	21	117	29.58	50.6	28.86	0.74	15.9	9.07	19.5	8.69	329.2	0.3	0.82	1.66	867.8	86.78	13.8	76.67	312	100.65	2729	58.06	107	194.55	1935	84.13	84.13	12.2	152.5	692.9	98.99	153.3	204.4	7.7	51.31	9.92	66.11
7	Female	33	61.23	1.7	21.14	2128	86.2	16.2	1.41	295.3	55.51	4.82	25	110	20.62	66.6	28.17	1.09	17	7.19	25	19.3	86.2	0.36	1.63	0.55	1335	133.5	22	122.22	425	132.81	3497	74.4	123.7	224.91	3000	130.43	130.43	16.5	206.25	1016	145.14	107.9	143.87	7.96	53.04	19.6	130.67
10	Female	38	90	1.83	26.91	2096	128.5	24.52	1.43	217.7	41.55	2.42	21	88	16.74	80.6	34.61	0.9	24.7	10.61	30.3	10.9	519.4	0.97	0.81	1.63	879.2	87.92	12.3	68.33	340.2	106.31	3729	79.34	124.2	225.82	3007	130.74	130.74	14.7	183.75	1017	145.29	128.1	170.8	4.75	31.66	16.2	108
16	Female	38	58.96	1.68	20.98	1409	90.5	25.69	1.53	146.5	41.59	2.48	13	56	15.95	48	30.66	0.81	15.2	9.71	17	7.08	667.8	0.27	0.8	1.45	566.9	56.69	10	55.56	203.8	63.69	2309	49.13	129	234.55	2092	90.96	90.96	7.45	93.09	592.4	84.63	88.7	118.27	7.52	50.13	6.44	42.92
8	Female	41	61	1.5	27.16	1707	80.7	18.91	1.32	214.7	50.31	3.52	18	126	29.48	60.4	31.85	0.99	27	14.24	19.7	7.67	255.2	0.36	1.09	0.73	775.6	77.56	11.3	62.78	344.1	107.53	2528	53.79	95.6	173.82	2775	120.65	120.65	11.4	142.5	659.4	94.2	28.1	37.47	2.07	13.78	10.2	68
2	Female	50	61.23	1.52	26.36	1085	58.7	21.64	0.96	159.4	58.76	2.6	20	96	35.24	27.2	22.56	0.44	6.94	5.76	9.81	7.67	232.5	0.07	1.61	2.58	572	57.2	9.32	51.76	256.4	80.13	2187	46.53	71.7	130.36	1096	47.65	47.65	6.56	82.01	533.9	76.27	189.1	252.13	1.05	6.97	9.19	61.27
4	Female	50	61.24	1.57	24.69	1497	79	21.11	1.29	213.8	57.13	3.49	27	88	23.41	40.2	24.17	0.66	11	6.61	18.2	8.14	175.7	0.57	1.74	0.63	462.4	46.24	13.1	72.78	415.6	129.88	3022	64.3	127.9	232.55	2542	110.52	110.52	13.7	171.25	660.5	94.36	96.9	129.2	1.27	8.49	12.9	86
26	Male	18	65.77	1.8	20.22	2516	142.4	22.64	2.17	266.8	42.42	4.06	23	113	17.97	99.5	35.59	1.51	35.5	12.7	38	17.4	699.2	0.56	1.53	2.69	1332	102.46	14.9	135.45	401.5	97.93	3656	77.79	182.4	331.64	4401	191.35	191.35	16.8	152.73	1384	153.78	85.5	114	6.59	43.91	14.8	98.67
21	Male	19	70.3	1.73	23.57	1912	94.4	19.75	1.34	182.2	38.12	2.59	19	66	13.77	88.6	41.71	1.26	39.4	18.55	29.5	10.5	510.4	1.61	0.88	1.65	796.7	79.67	11.8	147.5	232.6	58.15	2268	48.26	111.2	202.18	5138	223.39	223.39	14.1	128.18	1121	124.56	79.5	88.33	2.65	17.66	8.66	57.7
22	Male	19	63.5	1.55	26.45	1482	77	20.78	1.21	211.9	57.19	3.34	21	93	24.97	38.6	23.44	0.61	15.8	9.6	10.3	5.22	128.1	0.4	1.08	0.09	1044	104.4	8.8	110.05	253.8	63.45	2332	49.62	69.5	126.36	2689	116.91	116.91	7.6	69.1	1674	186	121.7	135.22	6.11	40.75	16.1	107.33
24	Male	20	72.57	1.85	21.11	3270	233.5	28.56	3.22	372.4	45.55	5.13	51	162	19.85	103.7	28.54	1.43	29.8	8.2	40.1	17.4	652.8	0.21	1.14	5.04	1889	188.9	34.5	431.25	762.2	190.55	6348	135.06	196.4	357.09	2144	93.22	93.22	24.5	222.73	1430	158.89	228.3	253.67	6.13	40.83	18	120
27	Male	20	54.88	1.5	24.44	1306	88.5	27.11	1.61	108.9	33.35	1.98	13	28	8.45	60	41.35	1.09	19.4	13.37	22	9.57	387.8	1.46	0.82	2.41	452.3	45.23	22	275	184.8	46.2	1212	25.79	122.1	222	1953	84.91	84.91	12.6	114.55	593.7	65.97	3.14	3.49	1.73	11.52	13	86.67
28	Male	21	72.57	1.88	20.54	2690	99.9	14.86	1.38	351.2	52.22	4.84	24	157	23.38	93.2	31.18	1.28	30.1	10.07	16.8	8.62	221.3	1.99	1.28	5.58	919	91.9	25.1	313.75	199.6	49.9	2517	53.55	120.1	218.36	3301	143.52	143.52	11.7	106.36	398.1	44.23	102.9	114.33	6.1	40.63	8.54	56.93
23	Male	23	62	1.75	20.18	2288	137.7	24.07	2.22	229.3	40.09	3.7	17	107	18.64	92.4	36.35	1.49	26.1	10.27	39	19.6	782.5	6.44	2.28	2.25	1413	141.3	9.91	123.81	358.7	89.68	4115	87.55	199.7	363.09	3426	148.96	148.96	9.69	88.05	1254	139.33	168	186.67	5.44	36.28	8.83	58.89
9	Male	27	66	1.85	19.2	1828	108.3	23.7	1.64	253.2	55.4	3.84	17	138	30.09	45.4	22.35	0.69	14.6	7.19	18	6.91	400	0.13	0.52	0.33	1205	120.5	9.34	116.78	266.1	66.53	3299	70.19	148	269.09	2443	106.22	106.22	9.8	89.13	623.2	69.24	55.9	62.11	16.5	110	3.47	23.16
3	Male	31	74.84	1.75	24.37	1695	115.8	27.33	1.55	221.3	52.22	2.96	26	110	25.89	44.2	23.47	0.59	10.5	5.58	20.8	9.12	404	0.01	0.46	1.05	1308	130.8	12.8	160	488.6	116.33	4401	93.64	127.4	231.64	3447	149.87	149.87	9.65	87.71	1038	115.33	331.5	368.33	6.75	44.98	19.9	132.67
29	Male	31	56.69	1.57	22.86	1726	88.5	20.51	1.56	184.1	42.67	3.25	19	57	13.09	72.7	37.91	1.28	27.4	14.29	22.8	15.9	183.4	0.33	2.15	4.07	900.9	90.09	12.3	153.75	274.5	65.36	2457	52.28	96.9	176.18	1838	79.91	79.91	10.6	96.36	571.4	63.49	44.9	49.89	6.43	42.85	9.73	64.86
25	Male	34	62.5	1.91	17.22	3239	142.1	17.55	2.27	374	46.19	5.98	20	100	12.37	94.4	26.23	1.51	38.8	10.78	20.3	8.98	304.3	0.67	1.27	0.32	1185	118.5	25	312.5	243.8	58.05	2497	53.13	140.4	255.27	4783	207.96	207.96	11.3	102.73	258	28.67	163.4	181.56	1.37	9.15	8.38	55.85
20	Male	35	78.92	1.85	22.95	1975	103.2	20.9	1.31	274.3	55.55	3.48	38	105	21.16	58.3	26.57	0.74	17.1	7.79	21.4	12.9	175.9	0.5	2.27	0.59	1026	102.6	14.8	185	460.9	109.74	3504	74.55	135.7	246.73	4116	178.96	178.96	12.8	116.36	706.5	78.5	172.9	192.11	4.52	30.11	7.1	47.34
1	Male	50	83.91	1.78	26.54	1248	82	26.28	0.98	116.5	37.34	1.39	7	39	12.56	49.9	35.99	0.59	15.9	11.47	18.9	10.4	506	0.66	1.12	2.56	498.3	49.83	9	112.45	229.1	54.55	2921	62.15	101.9	185.27	1251	54.39	54.39	9.55	86.81	364.5	40.5	15.3	17	1.77	11.79	4.32	28.82
30	Female	35	71.21	1.78	22.53	1868	118.6	25.4	1.67	172.2	36.87	2.42	16	72	15.48	77.5	37.34	1.09	21	10.12	25.4	22.2	391.5	1.04	3.36	8.07	887.2	88.72	10	55.56	210.2	65.69	2155	45.85	119.7	217.64	3753	250.2	163.17	8.5	106.19	564.1	80.59	20.2	26.93	2.73	18.22	7.58	50.54
31	Male	23	84.82	1.83	25.36	3262	153.3	18.8	1.81	371.4	45.54	4.38	30	142	17.39	134.8	37.19	1.59	43.9	12.11	30.3	14.6	332.8	2.24	1.14	3.87	1814	181.4	22.4	280	479.2	119.8	3524	74.98	83.9	152.55	6315	421	274.57	17	154.55	728.3	80.92	119.7	133	5.2	34.69	13.4	89.33
32	Male	26	93	1.85	27.17	2208	144.4	26.16	1.55	288.9	52.34	3.11	28	101	18.22	54.9	22.38	0.59	19.2	7.83	14.4	7.77	341.8	0.48	0.81	1.26	1097	109.7	17.3	216.25	323.7	80.93	2555	54.36	152.3	276.91	5193	346.2	225.78	9.11	82.84	404.4	44.93	29.6	32.89	1.11	7.41	7.12	47.49
33	Male	20	83.46	1.83	24.92	1654	126.1	30.5	1.51	179.1	43.31	2.15	18	60	14.58	47.9	26.06	0.57	18.1	9.85	14	9.33	356.8	0.45	0.8	1.5	516.5	51.65	12.8	160	321.9	80.48	2001	42.57	144.1	262	1878	125.2	81.65	9.76	88.71	642.7	71.41	144.3	160.33	2.39	15.92	9	59.99
38	Male	42	78.93	1.78	24.91	3167	247.3	31.23	3.13	346.4	43.75	4.39	34	124	15.6	90.9	25.83	1.15	29	8.24	30.2	15.3	806.4	0.69	0.93	8.33	1049	104.9	18.8	235	582.6	138.71	4313	91.77	265.9	483.45	2946	196.4	128.09	22	200	959.7	106.63	21	23.33	0	0	6.79	45.24
39	Male	20	66.7	1.78	21.05	2387	198.1	33.2	2.97	214.9	36.01	3.22	33	97	16.19	92.8	34.99	1.39	28.5	10.75	33	16.7	324.9	0.04	0.86	1.28	855.4	85.54	47.9	598.75	551.4	137.85	4237	90.15	116.6	212	1531	102.07	66.57	24.1	219.09	1194	132.67	120.4	133.78	57.3	382	27.8	185.33
40	Female	28	55	1.57	22.18	1771	82.7	18.68	1.5	303.9	68.64	5.53	54	93	21.1	32.3	16.41	0.59	6.97	3.54	11.7	5.64	96.7	0.03	0.54	0.62	1233	123.3	25	138.89	227.3	73.32	2984	63.49	33.1	60.18	2724	181.6	118.43	4.86	60.73	560.9	80.13	356.7	475.6	2.97	19.77	3.95	26.35
34	Female	19	63.5	1.65	23.32
35	Female	26	53.07	1.57	21.53
36	Female	23
37	Female	19	86.18	1.73	28.79
[truncated: 20 more columns]
