# Supplementary material for: Evaluation of Dietary Intakes and Supplement Use in Paralympic Athletes
Source: Nutrients. 2017 Nov 21;9(11):1266. doi: 10.3390/nu9111266 (PMC5707738; doi:10.3390/nu9111266)
Supplement: Supplementary file 1 [file nutrients-09-01266-s001.zip › S4 Dietary Supplement Usage.xlsx]

## Sheet: Dietary Supplement Usage
ID	Age	Gender	SportClass	TrainingPhase	LevelComp	TrainingHrs	UseSuppl	MVMM	BVit	VitC	VitE	VitD	OtherVit	ListVit	Iron	Calcium	Magnesium	OtherMineral	ListMineral	VitaminWater	ProteinPowder	SportBar	BCAA	Glucosamine	BetaA	Glutamine	FattyAcids	SportDrink	EnergyDrink	Caffeine	Creatine	RecoveryDrink	PlantExtract	Probiotics	GelGummies	Other	OtherSupple	ReasonMedical	ReasonDiet	ReasonHealthy	ReasonMuscle	ReasonEndurance	ReasonOthers	ReasonConvenient	ReasonAllergy	ReasonEnergy	ReasonRecovery	ReasonImmune	ReasonPerformance
1	50	0	2	2	2	0	1	2	3	3	3	3	3	N/A	2	3	3	3	N/A	3	2	2	3	3	3	3	3	2	1	3	2	3	3	3	3	3	N/A	1	0	0	0	0	0	0	0	1	0	0	0
2	50	1	2	1	2	1	1	3	3	3	3	3	3	N/A	2	2	3	3	N/A	2	2	1	3	3	3	3	2	2	3	3	3	3	2	2	2	3	N/A	0	0	1	0	1	0	1	0	1	0	0	1
3	31	0	2	1	2	1	1	2	3	1	3	2	4	N/A	3	2	2	3	N/A	2	1	3	1	3	3	3	2	1	2	3	3	2	1	2	3	3	N/A	0	1	0	1	0	0	0	0	1	1	0	0
4	39	1	0	1	2	1	1	0	3	3	3	0	0	fish oil	3	3	3	3	N/A	3	3	3	3	0	3	3	0	3	3	3	3	3	3	3	3	3	N/A	1	0	1	0	0	0	0	0	0	0	1	1
5	25	1	2	1	2	1	1	3	3	2	3	3	3	N/A	3	3	3	3	N/A	2	2	2	4	4	4	4	0	1	3	3	3	3	2	3	3	3	N/A	1	0	0	0	0	0	1	0	0	1	0	0
6	22	1	2	1	2	2	1	3	3	1	3	1	1	Essential fatty acid/Cranberry pills (D-Manose)	1	1	3	3	N/A	1	3	2	3	3	3	3	1	2	2	3	3	3	1	2	2	3	N/A	1	1	1	0	0	1	1	0	1	0	1	0
7	33	1	2	1	2	3	1	3	3	3	3	1	3	N/A	3	3	3	3	N/A	3	3	3	3	3	3	3	3	2	3	3	3	3	2	2	3	3	N/A	0	0	1	0	0	0	0	0	0	0	0	0
8	41	1	2	0	2	3	1	1	1	3	3	1	3	N/A	1	3	3	3	N/A	3	1	2	3	3	3	3	3	1	3	3	3	3	3	3	3	3	N/A	1	0	1	0	0	0	0	0	1	0	0	0
9	27	0	2	1	2	3	1	3	3	3	3	0	3	N/A	3	3	3	3	N/A	3	3	3	3	3	3	3	0	3	3	3	3	3	3	3	3	3	N/A	0	0	0	0	0	0	0	0	0	0	0	0
10	38	1	2	0	2	2	1	3	3	3	3	3	3	N/A	3	3	3	3	N/A	2	3	3	3	3	3	3	3	2	3	3	3	3	3	3	3	3	N/A	0	0	0	0	0	0	0	0	0	0	0	0
11	27	1	2	1	2	2	1	2	3	3	3	0	3	N/A	3	3	3	3	N/A	2	0	1	3	3	3	3	2	0	2	0	3	3	0	3	2	3	N/A	1	1	1	1	1	0	0	0	1	1	1	1
12	28	1	2	0	2	3	1	3	3	3	3	0	3	N/A	3	3	3	3	N/A	3	2	2	3	3	3	3	3	2	2	3	3	3	3	3	3	3	N/A	0	0	1	0	0	0	0	0	0	0	0	1
13	18	1	2	1	2	3	0	3	3	3	3	3	3	N/A	3	3	3	3	N/A	3	3	3	3	3	3	3	3	3	3	3	3	3	3	3	3	3	N/A	0	0	0	0	0	0	0	0	0	0	0	0
14	26	1	2	0	2	3	1	3	4	3	3	0	3	N/A	0	3	3	3	N/A	3	3	3	4	4	4	4	3	1	3	3	3	3	3	4	4	3	N/A	1	1	0	1	0	0	0	0	1	0	1	1
15	26	1	2	0	2	3	1	0	0	1	1	0	0	Cranberry	0	0	3	3	N/A	3	0	0	3	3	3	3	0	1	0	0	1	0	0	2	0	3	N/A	1	1	1	1	0	0	0	0	1	0	0	1
16	38	1	2	1	2	3	1	3	3	3	3	0	3	N/A	3	3	3	3	N/A	3	3	3	3	3	3	3	3	3	3	3	3	3	1	0	3	3	N/A	1	0	0	0	0	0	0	0	0	0	1	0
17	23	1	2	1	2	0	1	1	0	1	3	0	3	N/A	0	0	2	3	N/A	2	2	2	3	3	3	3	2	2	3	3	3	2	2	3	3	3	N/A	1	0	1	1	1	0	0	0	1	1	1	0
18	27	1	2	1	2	3	1	3	3	3	3	2	3	N/A	2	3	3	3	N/A	2	2	2	3	3	4	3	3	2	3	3	2	2	2	3	2	3	N/A	0	1	0	0	0	0	0	0	1	1	0	0
19	24	1	2	1	2	3	1	0	3	3	3	0	3	N/A	3	3	3	3	N/A	3	0	0	3	3	3	3	3	0	1	3	3	3	3	3	1	3	N/A	1	0	1	1	0	0	0	0	0	1	0	0
20	35	0	2	0	2	3	1	3	0	3	3	0	3	N/A	3	3	3	3	N/A	3	3	0	3	3	3	3	0	2	3	3	3	2	2	3	3	3	N/A	1	0	1	0	0	0	0	0	1	1	1	1
21	19	0	2	1	1	3	1	3	3	3	3	3	3	N/A	3	3	3	3	N/A	3	3	1	3	3	3	3	3	1	3	3	3	3	3	3	3	3	N/A	0	0	0	0	0	0	1	0	0	0	0	0
22	19	0	2	1	2	3	1	3	0	3	3	3	3	N/A	3	3	3	3	N/A	2	2	1	3	3	3	3	3	1	3	3	3	3	3	3	3	3	N/A	0	1	0	0	0	0	0	0	0	0	0	0
23	23	0	2	1	1	3	1	3	3	3	3	3	3	N/A	3	3	3	3	N/A	3	3	0	3	3	3	3	3	3	3	3	3	3	3	0	3	3	N/A	0	0	0	0	0	0	0	0	0	0	0	0
24	20	0	2	0	2	3	1	3	3	2	3	0	3	N/A	3	3	3	3	N/A	2	0	0	3	3	3	3	3	0	2	3	0	3	3	3	3	3	N/A	0	0	0	1	0	0	0	0	0	0	0	1
25	34	0	2	1	2	3	1	1	3	3	2	1	2	N/A	3	3	3	3	N/A	3	0	1	2	3	3	3	3	0	1	1	1	3	2	4	1	4	N/A	0	0	0	0	0	0	0	0	0	0	0	0
26	18	0	2	1	2	3	1	0	3	3	3	3	3	N/A	3	3	3	3	N/A	3	1	0	3	3	3	3	3	3	2	3	2	3	2	3	3	3	N/A	0	0	1	0	0	0	0	0	0	1	1	0
27	20	0	2	0	2	3	1	3	3	3	3	2	3	N/A	3	3	3	3	N/A	3	3	1	3	3	3	3	2	1	3	3	3	3	3	3	3	3	N/A	1	0	0	0	0	0	0	0	0	0	0	0
28	21	0	2	0	0	3	1	4	3	3	3	1	3	N/A	3	3	3	3	N/A	2	3	0	4	4	4	4	3	0	1	3	3	1	3	3	4	3	N/A	1	1	1	0	0	0	1	0	0	0	0	1
29	31	0	2	0/1	2	3	1	0	0	2	3	0	3	N/A	3	3	3	3	N/A	3	0	1	3	2	3	2	2	1	2	3	2	3	1	3	2	3	N/A	1	1	1	1	1	0	1	1	1	1	1	0
30	35	1	2	1	2	1	1	2	2	0	2	0	3	n/a	2	0	3	0	zinc	3	0	3	3	3	3	3	3	3	3	3	3	3	3	3	3	3	N/A	1	0	1	0	0	0	1	0	0	0	1	0
31	23	0	2	0	2	2	1	2	1	3	3	3	0	Omega 3/6/9 Jameson	3	3	3	3	N/A	2	0	0	2	3			0	0	0	3	0	2	3	2	2	3	N/A	0	1	1	1	1	0	1	0	1	1	1	1
32	26	0	2	1	2	3	1	0	3	0	3	3	3	N/A	3	0	3	3	N/A	3	0	0	2	3			3	1	0	3	0	3	3	3	3	3	N/A	0	1	1	1	1	0	0	0	1	1	1	1
33	20	0	2	1	1	2	1	3	3	3	3	3	3	N/A	3	3	3	3	N/A	2	1	1	1		1		2	1	1	3	3	3	1	3	3	1	Dynamis Refuel S6K Advanced Recovery Protein / Dynamis Fuel XRM Pre Workout Compound	0	0	1	1	0	0	0	0	0	1	1	1
34	19	1	2	1	.	0	0	3	3	3	3	3	3	N/A	3	3	3	3	N/A	3	3	3	3	3	3	3	3	3	3	3	3	3	3	3	3	3	N/A	0	0	0	0	0	0	0	0	0	0	0	0
35	26	1	2	1	2	3	1	2	3	3	3	3	3	N/A	3	2	2	3	N/A	2	0	0	3	3	3	2	0	1	2	3	2	2	1	2	2	3	N/A	0	1	1	0	0	0	0	1	0	1	1	1
36	23	1	2	0	2	3	1	3	2	3	3	3	3	N/A	2	3	2	3	N/A	2	2	2	3	4	4	3	3	1	1	3	3	3	2	3	3	3	N/A	0	0	0	0	0	0	0	0	0	0	0	0
37	19	1	2	0	2	3	1	2	2	3	3	3	3	N/A	3	3	3	3	N/A	2	2	2	3	3	3	3	2	2	2	3	3	2	2	3	3	3	N/A	0	0	1	0	0	1	0	0	1	0	0	0
38	42	0	0	1	2	1	1	2	3	3	3	3	2		4	2	3	3	N/A	1	0	2	3	3	3	3	3	0	3	3	3	3	3	3	3	3	N/A	0	0	0	0	0	0	0	0	1	1	0	1
39	20	0	0	1	2	3	1	0	0	3	3	3	3	N/A	0	3	3	3	N/A	3	0	3	3	4	3	1	3	0	3	3	3	0	1	1	2	0	Saqee Herbal Extract, AHCC, Herbal Anmein Pien, Melatonin	0	0	0	1	1	0	1	0	1	1	0	1
40	28	1	0	0	0	2	1	3	3	3	3	3	3		3	3	3	3		2	3	1	3	3	3	3	3	1	3	3	3	3	3	3	3	3		0	0	0	0	0	1	0	0	0	0	0	0
[truncated: 53 more columns]
